# Supplementary material for: Innovative snail-mucus-extract (SME)-coated nanoparticles exhibit anti-inflammatory and anti-proliferative effects for potential skin cancer prevention and treatment
Source: Royal Society of Chemistry journal article supplement (doi:10.1039/d4ra00291a), 2024-01-01
Supplement: d4ra00291a1.pdf [file d4ra00291a1.pdf]

## “Innovative snail-mucus-extract (SME)-coated nanoparticles exhibit anti-inflammatory and anti-proliferative effects for potential skin cancer prevention and treatment”

### SUPPORTING INFORMATION

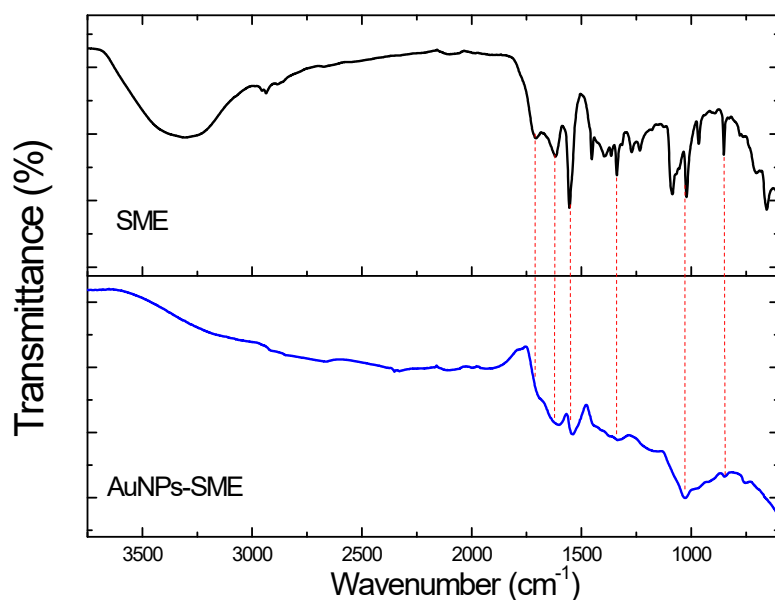

Figure S1. FTIR-ATR spectra for SME and AuNPs-SMR dried samples

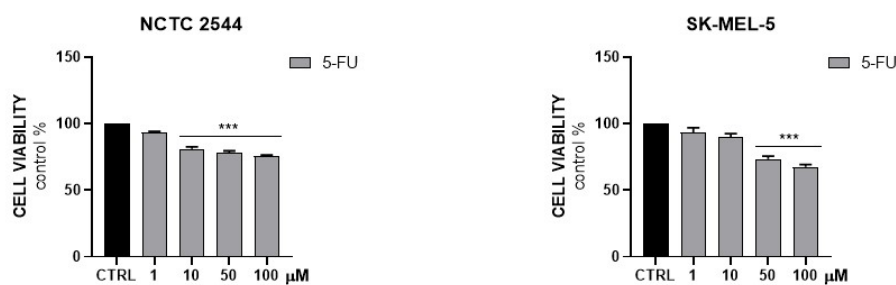

Figure S2. Evaluation of keratinocytes and melanoma cells viability after treatment with standard chemotherapeutic agent 5-FU (10, 50, 100 μM) for 48h. Results are expressed as mean ± SEM. (\*\*\*) $p < 0.0005$  vs CTRL)

| AuNPs-SME | EC50 values (μg/mL) ± SD |
|-----------|--------------------------|
| SK-MEL-2  | 178,48 ± 0,29            |
| SK-MEL-5  | 140,92 ± 0,54            |

Table S1. EC50 values (μM) of AuNPs-SME on melanoma cells.
